# Supplementary material for: Hyperreflective foci, OCT progression indicators in age-related macular degeneration, include transdifferentiated retinal pigment epithelium
Source: bioRxiv or medRxiv preprint supplement (doi:10.1101/2021.04.26.21256056), 2021-07-03
Supplement: Supplementary file [file media-1.pdf]

1 **Clinically visible progression indicators in age-related macular**  
2 **degeneration are transdifferentiated retinal pigment epithelium**

3

4 Dongfeng Cao PhD, Belinda Leong MD, Jeffrey D. Messinger DC, Deepayan Kar MS,  
5 Thomas Ach MD, Lawrence A. Yannuzzi MD, K. Bailey Freund MD, Christine A. Curcio  
6 PhD

7

8 **Corresponding author. Email: [christinecurcio@uabmc.edu](mailto:christinecurcio@uabmc.edu)**

9

10 **SUPPLEMENTARY MATERIALS**

11 **LIST of SUPPLEMENTARY FIGURES**

12 Fig. S1. A path from hyperreflective foci (HRF) to complete retinal pigment epithelium  
13 (RPE) and outer retinal atrophy (cRORA) in AMD.

14 Fig. S2. Henle fibers in the human macula.

15 Fig. S3. Retinal pigment epithelium plumes exhibit directionality

16 Fig. S4. Duration and evolution of plumes

17 Fig. S5. Variations in RPE plume trajectory in atrophy.

18 Fig. S6. HRF in ex vivo OCT match intraretinal RPE on histology

19 Fig. S7. Positive and negative controls for immunohistochemistry

20 Fig. S8: RPE corresponding to HRF and other abnormal cells are CD163+

21 Fig. S9. Gain- and loss-of-function of RPE and RPE-derived cells

22 Fig. S10. Dispersing melanosomes follow regionally specific trajectories of Müller glia

23

24 **LIST of SUPPLEMENTARY TABLES**

25 Table S1. Demographics of clinic patients

|    |                                                                     |
|----|---------------------------------------------------------------------|
| 26 | Table S2. Plume disposition at final visit                          |
| 27 | Table S3. Plume trajectory relative to HFL and macular quadrant     |
| 28 | Table S4. Plume association with atrophy                            |
| 29 | Table S5. Characteristics of donor eyes                             |
| 30 | Table S6. Antibodies used                                           |
| 31 | Table S7: Morphologic phenotypes of RPE and its basal lamina in AMD |
| 32 |                                                                     |
| 33 |                                                                     |

34 **Supplementary figures**

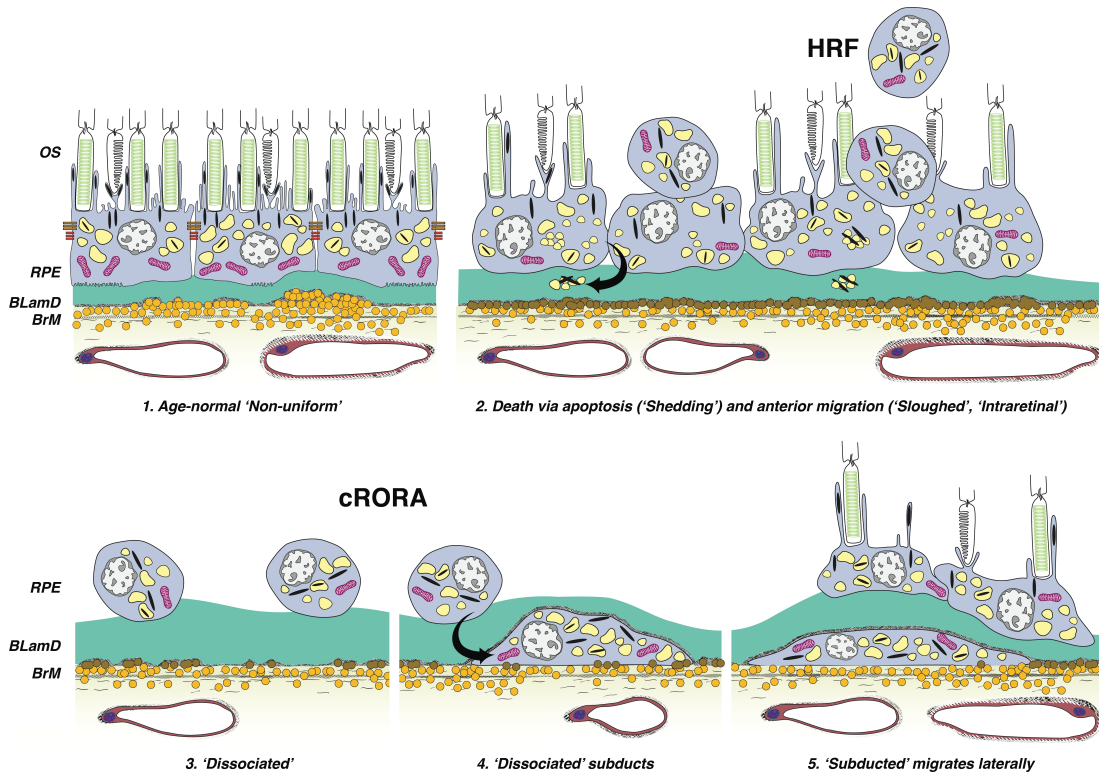

35

36 **Fig. S1. a path from hyperreflective foci (HRF) to complete retinal pigment**  
 37 **epithelium (RPE) and outer retinal atrophy (cRORA) in AMD.**

38 cRORA is a multilayer definition of atrophy for OCT (12). Six morphologic phenotypes of  
 39 RPE from a system of 15 (25) are shown. Schematic applies to non-neovascular AMD  
 40 only. (1) Age-normal “nonuniform” RPE overlies Bruch’s membrane (BrM), which has  
 41 abundant lipoprotein particles (yellow). Basal laminal deposit (BLamD, green) is  
 42 thickened basement membrane material between the RPE cell body and native RPE  
 43 basal lamina. RPE organelles from apical to basal are melanosomes (black), lipofuscin  
 44 (yellow), and mitochondria (pink) (9). Of overlying neurosensory retina, only  
 45 photoreceptor outer segments are shown. (2) Anteriorly migrated RPE (“sloughed” and  
 46 “intraretinal”) manifest clinically as HRF. “Shedding” cells release organelle clusters  
 47 (arrow, granule aggregates) basally into BLamD and can be visible in OCT. (3) Due to

48 cell death and migration, the RPE layer disintegrates. "Dissociated" RPE are fully  
49 pigmented, nucleated cells scattered in the atrophic zone that are eventually cleared.  
50 BLamD persists after RPE death then is also cleared. **(4)** "Subducted" cells containing  
51 RPE organelles are flattened against BrM, appearing to originate from Dissociated cells  
52 (arrow). **5.** "Subducted" cells migrate outside the atrophic area.  
53

54

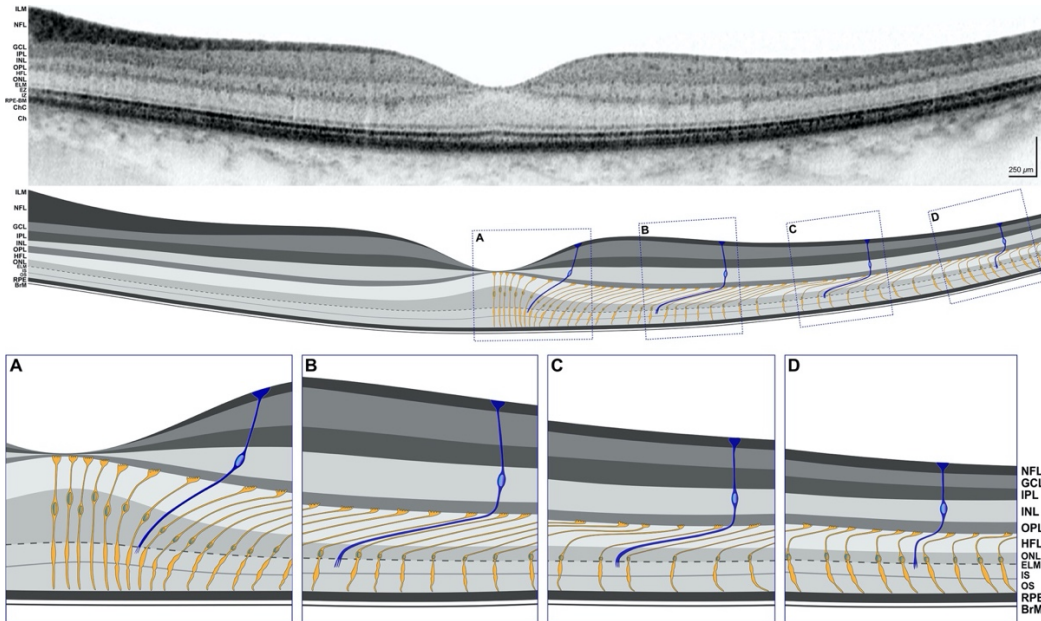

55

56 **Fig. S2. Henle fibers in the human macula.**

57 *Top:* Foveal OCT B-scan of a healthy female aged between 66 and 70 years  
58 demonstrating reflective bands corresponding to retinal layers. *Middle:* Schematized  
59 OCT scan shows cone photoreceptors (*yellow*) and Müller glia (*blue*). Müller glia span  
60 the retina, terminating at the external limiting membrane; for clarity, their branches in  
61 plexiform layers are omitted. The Henle fiber layer, shown in light gray, is visible in the  
62 original scan, especially under the fovea. *Bottom:* (A) At the foveal center, Henle fibers  
63 are short and perpendicular. (B) In the parafovea, Henle fibers are long and oblique. (C)  
64 In the perifovea, Henle fibers gradually shorten. (D) At the macula edge, Henle fibers are  
65 very short and nearly vertical. Henle fibers are not present elsewhere in the retina.  
66 Schematic of B-scan was prepared (Illustrator, version 23.0.3, Adobe Inc., San Jose,  
67 CA) from an OCT B-scan (Spectralis, Heidelberg Engineering, Germany). Schematic of  
68 cellular trajectories was prepared in reference to a histological section of a donor eye  
69 (female, 76-80 years) immuno-labeled for glial fibrillary acidic protein in Müller glia (87).  
70

71

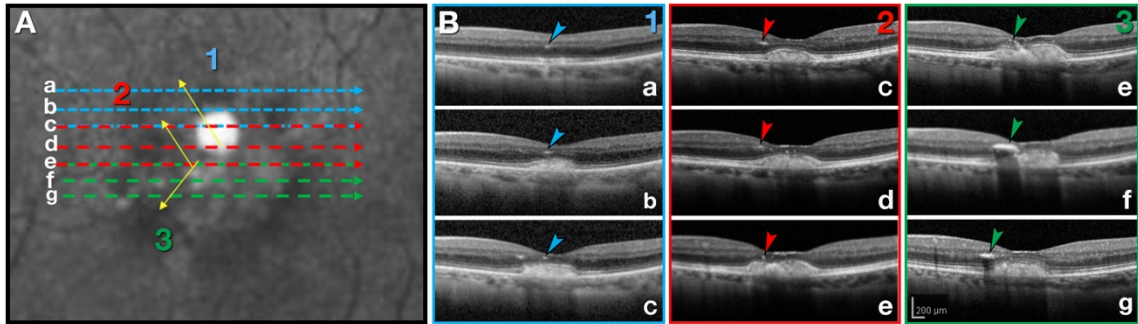

72

73 **Fig. S3. Retinal pigment epithelium plumes exhibit directionality.**

74 RPE plumes radiate outward from the fovea and thus may track as small reflective  
75 features across sequential horizontally oriented optical coherence tomography B-scans.  
76 **A.** Near-infrared reflectance (NIR) image shows plumes 1-3, with arrows indicating  
77 plume direction into the retina. Dashed lines (blue, red, green) correspond to scan lines  
78 a-g in panel B1-3. Positions of plumes, which are not visible in NIR, were assigned to  
79 this image and corresponded to the B-scans with the device software. **B.** Blue, red and  
80 green arrowheads indicate plumes 1-3, transected by each B-scan. In B1-c, a second  
81 plume is visible in addition to tracked plume 1. Scale bar in g applies to all panels of B.  
82

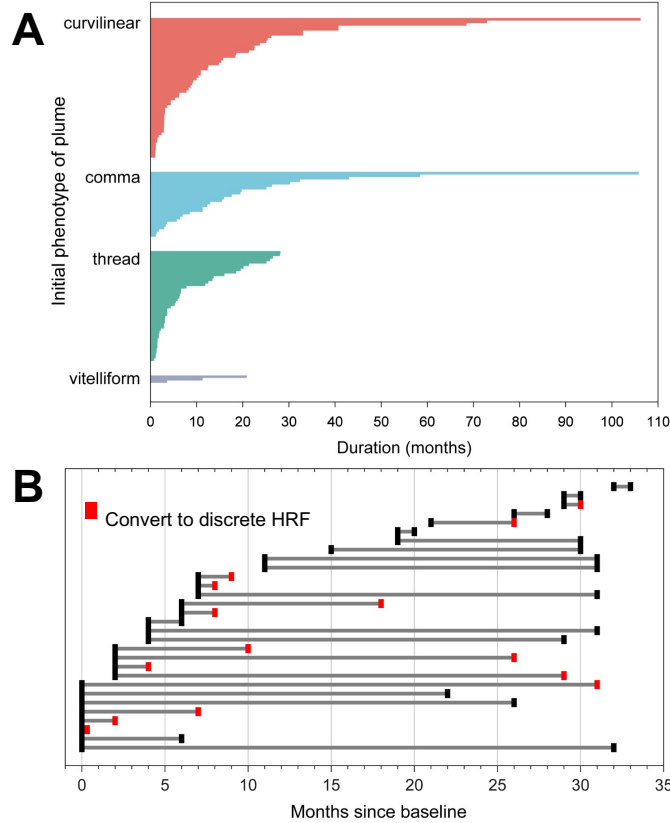

85 **Fig. S4: Duration and evolution of plumes.**

86 **(A)** Duration of each of 129 plumes, stratified by morphology, and displayed in

87 descending order of duration. The longest lasting plumes were curvilinear and comma.

88 **(B)** Each plume in one eye with the most plumes represented as a single horizontal line.

89 Duration is shown, with conversion to discrete HRF, no longer associated with the RPE,

90 indicated; representative of data from 3 eyes.

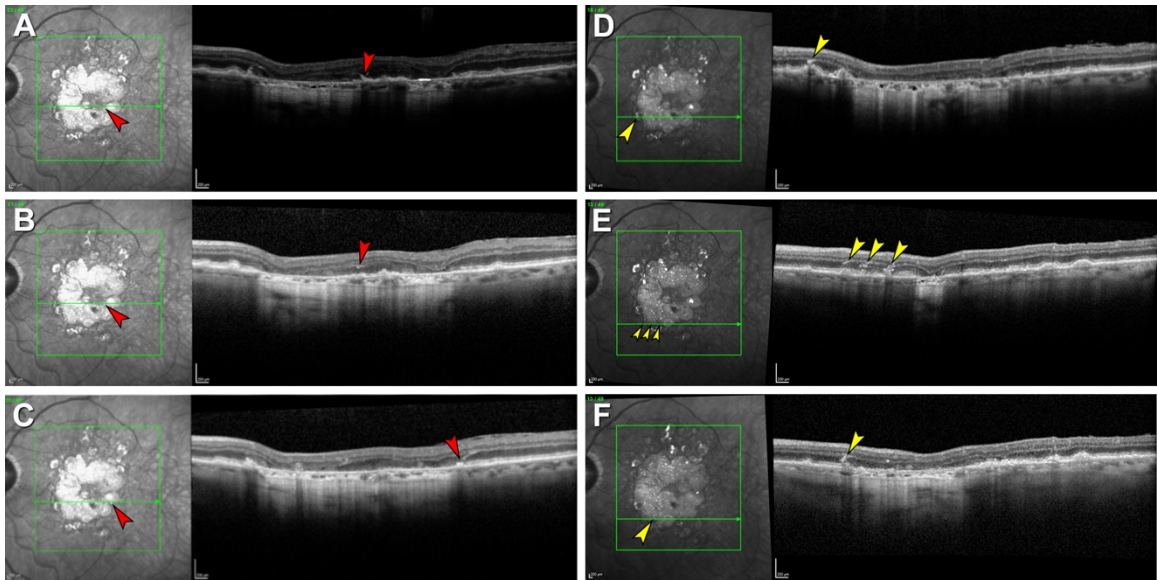

92

93 ***Fig. S5. Variations in RPE plume trajectory in atrophy.***

94 Plumes located along the border of complete RPE and outer retinal atrophy (cRORA,  
 95 (12)) are indicated in the near infrared reflectance images at the left of each panel.

96 Green lines indicate areas covered by OCT volumes and locations of individual B-scans  
 97 in A-F. (A and B) Posterior (A) and anterior (B) components of a plume (red arrowheads)

98 traversing radially away from the fovea, i.e., congruent with the HFL. (C) Another plume  
 99 (red arrowhead) is congruent with the normal HFL, adjacent to a hyporeflective wedge

100 (88). (D to F) Examples of plumes traversing anteriorly in the opposite direction, i.e.,  
 101 non-congruent with the normal HFL (yellow arrowheads), near the border of atrophy,

102 possibly due to subsidence (sinking) of outer retinal layers in atrophy.

103



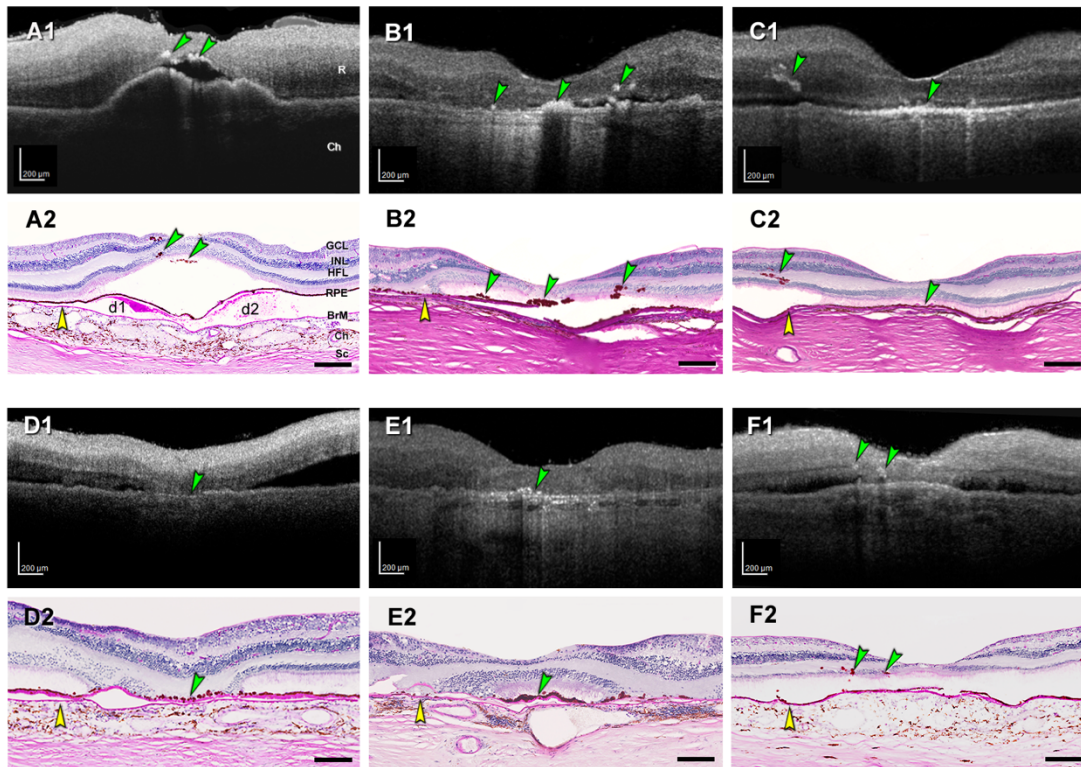

104

105 **Fig. S6. HRF in ex vivo OCT match intraretinal RPE on histology.**

106 Reflective features including hyperreflective foci (HRF) are visible in donor eyes

107 (numbers in [table S5](#) by ex vivo optical coherence tomography (A1 to F1). These were

108 matched with RPE phenotypes in histology sections stained with periodic acid Schiff

109 hematoxylin (PASH) (A2 to F2), to show Bruch's membrane (BrM), basal laminar

110 deposit, and drusen. In all panels, scale bars are 200 μm; yellow arrowheads indicate

111 BrM, and green arrowheads indicate HRF in OCT and ectopic RPE in histology. (**A1** and

112 **A2**) HRFs above soft drusen at fovea from early-intermediate AMD eye (#5). (**B1** and

113 **B2**) HRFs at the fovea and nasal and temporal side, from atrophic AMD eye (#17). (**C1**

114 and **C2**) RPE plume in atrophic AMD eye (#15). (**D1** and **D2**) Hyperreflective dots in

115 OCT and dissociated RPE atop thick BLamD in the atrophic area. (**E1** and **E2**) Reflective

116 dots under an island of surviving photoreceptors in the fovea center of an atrophic AMD

117 eye (#12). (**F1** and **F2**) Multiple HRFs nasal to the fovea in an early-intermediate AMD

118 eye, corresponding to intraretinal RPE cells (#7).

119

120

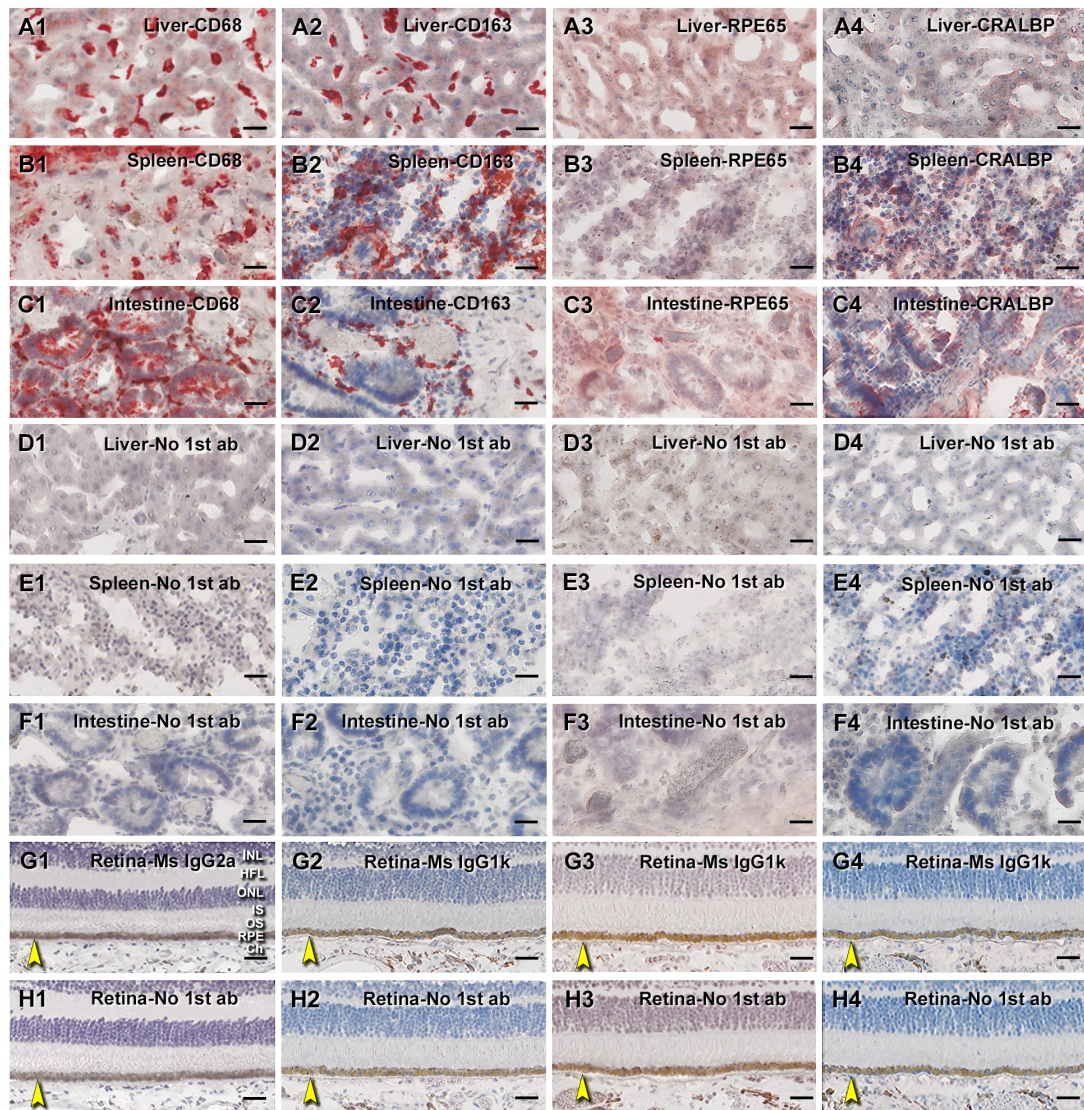

121

122 ***Fig. S7. Positive and negative controls for immunohistochemistry.***

123 A cryosection of human tissue array with liver, spleen, and intestine tissue made in-  
 124 house was used as positive and negative controls for immunohistochemistry studies with  
 125 antibodies to CD68, CD163, RPE65, and CRALBP (positive A to C, negative D to H).  
 126 Human retinal sections from an unremarkable eye (#3, [table S5](#)) was used for isotype  
 127 and sham controls. BrM was pointed by yellow arrows. Scale bars are 20 μm for non-  
 128 retinal tissues and 50 μm for retina. (A1 to A4) CD68+, CD163+, RPE65-, and CRALBP-

129 Kupffer cells in liver tissue. **(B1 to B4)** CD68+, CD163+, RPE65-, and CRALBP+ red  
130 pulp cells in spleen tissue. **(C1 to C4)** CD68+, CD163+, RPE65+, and CRALBP+ cells in  
131 intestine tissue. **(D1 to D4)** Liver sham controls. **(E1 to E4)** Spleen sham controls. **(F1 to**  
132 **F4)** Intestine sham controls. **(G1 to G4)** Retina isotype controls with mouse IgG2a for  
133 CD68 and mouse IgG1k for CD163, RPE65, and CRALBP. **(H1 to H4)** Retina sham  
134 controls for CD65, CD163, RPE65, and CRALBP. All human tissue sections have CD68  
135 and CD163 immunoreactivities and uncertain RPE65 and CRALBP immunoreactivities.  
136 All isotype and sham controls omitting primary antibodies control are negative.  
137

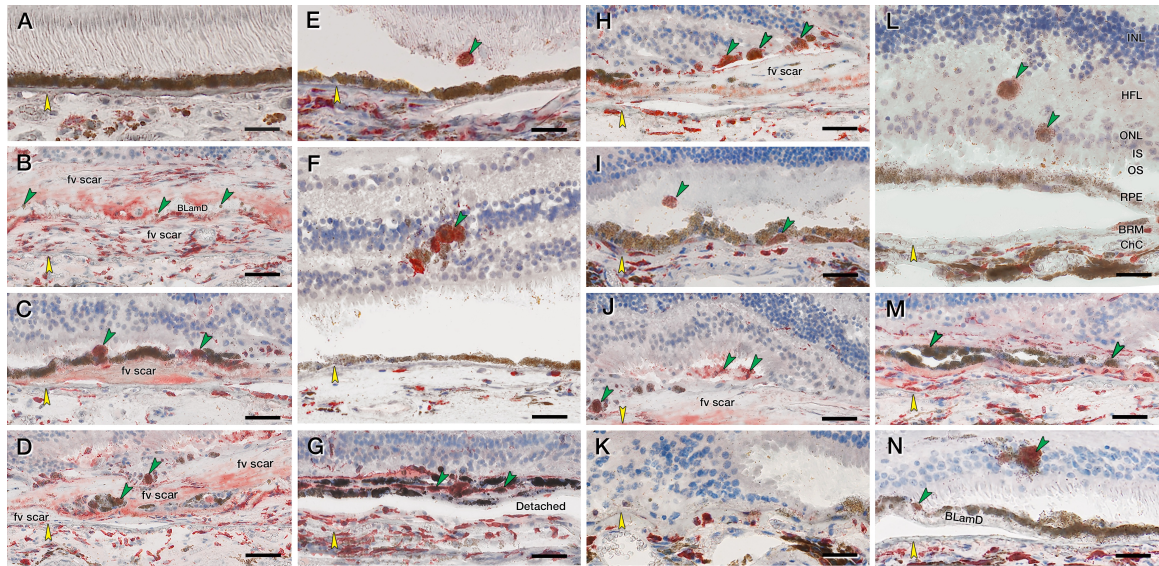

139

140 **Fig. S8. RPE corresponding to HRF and other abnormal cells are CD163+.**

141 Twenty donor eyes (16 AMD, 4 control; eye number in [table S5](#)) were used for  
 142 immunohistochemistry with mouse monoclonal anti-human CD163 ([table S6](#)). Fourteen  
 143 of 16 previously described morphologic phenotypes of RPE were identified ([table S7](#)). All  
 144 scale bars are 20  $\mu$ m; yellow arrowheads indicate BrM, and green arrowheads indicate  
 145 abnormal RPE phenotypes. (A) CD163- “Uniform” RPE, unremarkable (#1). (B) CD163-  
 146 “Shedding” RPE, nvAMD (#20). (C) CD163+ “Sloughed”, nvAMD (#20). (D) Both  
 147 CD163+ and CD163- are present in “Entombed” RPE, nvAMD (#20). (E) A single  
 148 CD163+migrating RPE above “Nonuniform” RPE layer, atrophic AMD (#17). (F) CD163+  
 149 “Intraretinal” RPE, atrophic AMD (#15). (G) Variable CD163 immunoreactivities in  
 150 “Melanotic” RPE, nvAMD (#20). (H) CD163+ “Severe” or “Very nonuniform” RPE,  
 151 nvAMD (#20). (I) CD163+ “Subducted” and “Sloughed” RPE, atrophic AMD (#16). (J)  
 152 CD163+ “Entubulated” and “Dissociated” RPE, nvAMD (#20). (K) There is no RPE in an  
 153 area of “Atrophy without BLamD”, atrophic AMD (#16). (L) CD163+ “Dissociated” and  
 154 “Intraretinal” RPE, atrophic AMD (#16). (M) Variable CD163 immunoreactivity in

155 “Bilaminar” RPE, nAMD (#20). (N) CD163+ “Intraretinal“ RPE at “Atrophy with BLamD”

156 area, atrophic AMD (#14).

157

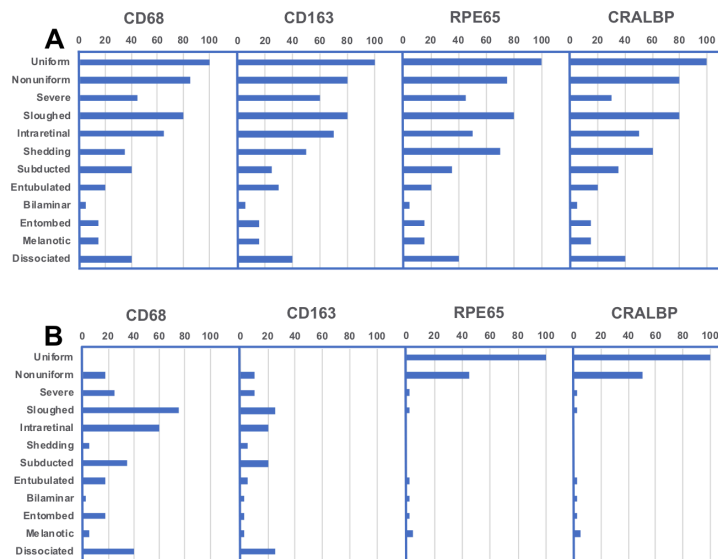

159

160 **Fig. S9. Gain- and loss-of-function of RPE and RPE-derived cells.**

161 (A) The distribution of phenotypes (vertical axis) was similar across the sections used for  
 162 immunohistochemistry for retinoid markers RPE65 and CRALBP and immune markers  
 163 CD68 and CD163 (at top of graphs). Uniform and Non-uniform phenotypes are age-  
 164 normal. Of the others, Entubulated and Subducted are found in geographic atrophy and  
 165 neovascular AMD, Melanotic is found only in neovascular AMD, and others are found at  
 166 all AMD diagnostic stages. Vitelliform and Vacuolated are not shown due to small  
 167 numbers in the current sample. (B) Bar lengths represent the percentage labelled  
 168 (scoring with 0-not labelled, 1-some labelled, and 2-all abnormal cells labelled; total  
 169 scores/ maximum possible score = 40 x 100) by CD68, CD163, RPE65 and CRALBP.  
 170 Age-normal uniform cells are strongly labelled by retinoid markers and are not labelled  
 171 by immune markers. Non-uniform cells exhibit a reduced proportion of retinoid markers  
 172 and a small proportion of immune markers. Phenotypes below “severely non-uniform” on  
 173 the vertical axis are considered abnormal. These are labeled for immune markers and

174 minimally labelled for retinoid markers (<5%), especially “Sloughed” and “Intraretinal”  
175 morphologies corresponding to HRF in OCT.  
176



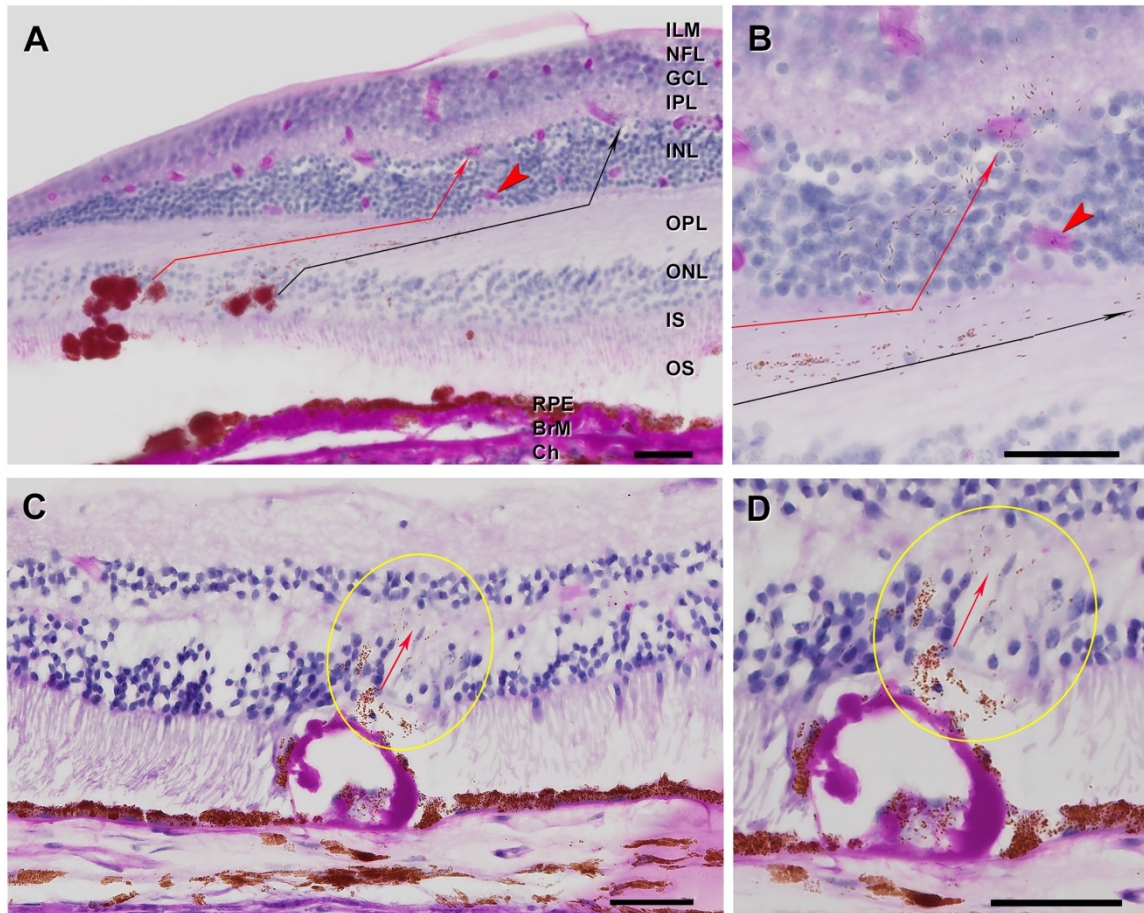

178

179 ***Fig. S10. Dispersing melanosomes follow regionally specific trajectories of Müller***  
 180 ***glia.***

181 **A and B**, donor aged 96-100 years (#17, [table S5](#)). **C and D**, donor aged 81-85 years  
 182 (#1, [table S5](#)). All scale bars are 50  $\mu$ m. Cryosection, periodic acid Schiff hematoxylin  
 183 stain. (**A and B**) In the macula RPE detritus follows the obliquely oriented HFL fibers and  
 184 crosses vertically into the INL. Thin red and black arrows indicate detritus emanating  
 185 from two groups of cells in the ONL. (**C and D**) In the periphery where HFL is absent,  
 186 RPE organelles enter vertically retina directly above an artifactually empty druse lined by  
 187 BLamD and lacking overlying RPE.

188 **Supplementary tables**189 **Table S1. Demographics of clinic patients**

| <b>Variable (SD, standard deviation)</b>                            | <b>Value</b>            |
|---------------------------------------------------------------------|-------------------------|
| Number of patients                                                  | 44                      |
| Number of eyes                                                      | 61                      |
| Age, mean $\pm$ standard deviation (years)                          | 79.4 $\pm$ 7.7          |
| Gender: Female, N (%)                                               | 29 (47.5)               |
| Eyes with RPE plume                                                 | 29 (47.5)               |
| Follow-up duration (years, per individual eyes)                     | 4.7 $\pm$ 0.09          |
| Total number of plumes                                              | 129                     |
| Plumes/eye (range, SD)                                              | 4.0 (1-30, 5.9)         |
| Distance in $\mu\text{m}$ , fovea to plume center, mean (SD); range | 1555 (SD 876); 0 – 3558 |
| <b>Presence of AMD features: N (%)</b>                              |                         |
| Soft drusen only                                                    | 10 (16.4)               |
| Cuticular drusen only                                               | 8 (13.1)                |
| Mixed drusen types                                                  | 34 (55.7)               |
| Drusenoid pigment epithelial detachment*                            | 27 (44.3)               |
| Complete RPE and outer retinal atrophy**                            | 29 (47.5)               |
| * $\geq 350 \mu\text{m}$ greatest linear diameter (89)              |                         |
| **cRORA as defined (12)                                             |                         |

190

191

192 **Table S2. Plume disposition at final visit**

| <b>Fates of 129 individual plumes (baseline vs final)</b>                                 | <b># (% of 129)</b> |
|-------------------------------------------------------------------------------------------|---------------------|
| Complete resolution <i>with conversion</i> to another plume morphology or discrete HRF    | 38 (29.5)           |
| Complete resolution <i>without conversion</i> to another plume morphology or discrete HRF | 36 (27.9)           |
| Unresolved <i>with conversion</i> to another plume morphology or discrete HRF             | 35 (27.1)           |
| Unresolved <i>without conversion</i> to another plume morphology or discrete HRF          | 20 (15.5)           |
| <b>Total</b>                                                                              | <b>129 (100)</b>    |

193

194

195 **Table S3. Plume trajectory relative to HFL and macular quadrant**

|                   | <b>Congruent<br/>With normal HFL</b> |                 | <b>Non-congruent<br/>With normal HFL</b> |                 |
|-------------------|--------------------------------------|-----------------|------------------------------------------|-----------------|
|                   | <b># eyes</b>                        | <b># plumes</b> | <b># eyes</b>                            | <b># plumes</b> |
| Curvilinear       | 17                                   | 42              | 7                                        | 15              |
| Comma             | 14                                   | 19              | 2                                        | 6               |
| Thread            | 12                                   | 36              | 5                                        | 7               |
| Vitelliform       | 3                                    | 4               | 0                                        | 0               |
| Superior temporal | 13                                   | 34              | 0                                        | 0               |
| Superior nasal    | 15                                   | 23              | 4                                        | 19              |
| Inferior nasal    | 9                                    | 18              | 2                                        | 5               |
| Inferior temporal | 17                                   | 26              | 3                                        | 4               |

196

197

198

199 **Table S4. Plume association with atrophy**

| <b>Association with atrophy (at final visit)</b>                                                                                                                                        | <b># (% of 129 total)</b> |
|-----------------------------------------------------------------------------------------------------------------------------------------------------------------------------------------|---------------------------|
| Associated with cRORA                                                                                                                                                                   | 73 (56.6)                 |
| Congruent                                                                                                                                                                               | 48 (37.2)                 |
| Incongruent                                                                                                                                                                             | 25 (19.4)                 |
| At cRORA border                                                                                                                                                                         | 16 (12.4)                 |
| Associated with iRORA                                                                                                                                                                   | 6 (4.7)                   |
| Congruent                                                                                                                                                                               | 6 (4.7)                   |
| Incongruent                                                                                                                                                                             | 0 (0)                     |
| Not associated with cRORA or iRORA                                                                                                                                                      | 50 (38.8)                 |
| <b>Total</b>                                                                                                                                                                            | <b>129</b>                |
| cRORA, complete RPE and outer retinal atrophy; iRORA, incomplete RPE and outer retinal atrophy (5, 12)<br>Congruent, incongruent; relative to trajectory of normal HFL at that location |                           |

200

201

202 **Table S5. Characteristics of donor eyes**

| <b>Order</b>                                                                                                                                                                                                                                                                                                    | <b>Age range</b> | <b>Sex</b> | <b>D-P, hours</b> | <b>Histologic diagnosis</b> |
|-----------------------------------------------------------------------------------------------------------------------------------------------------------------------------------------------------------------------------------------------------------------------------------------------------------------|------------------|------------|-------------------|-----------------------------|
| 1                                                                                                                                                                                                                                                                                                               | 81-85            | M          | 4.05              | Unremarkable                |
| 2                                                                                                                                                                                                                                                                                                               | 86-90            | F          | 5.48              | Unremarkable                |
| 3                                                                                                                                                                                                                                                                                                               | 76-80            | F          | 4.82              | Unremarkable                |
| 4                                                                                                                                                                                                                                                                                                               | 91-95            | F          | 3.75              | Unremarkable                |
| 5                                                                                                                                                                                                                                                                                                               | 86-90            | F          | 4.75              | Early-intermediate AMD      |
| 6                                                                                                                                                                                                                                                                                                               | 86-90            | F          | 3.25              | Early-intermediate AMD      |
| 7                                                                                                                                                                                                                                                                                                               | 91-95            | M          | 3.63              | Early-intermediate AMD      |
| 8                                                                                                                                                                                                                                                                                                               | 86-90            | F          | 4.95              | Early-intermediate AMD      |
| 9                                                                                                                                                                                                                                                                                                               | 81-85            | F          | 3.58              | Early-intermediate AMD      |
| 10                                                                                                                                                                                                                                                                                                              | 96-100           | F          | 3.98              | Early-intermediate AMD      |
| 11                                                                                                                                                                                                                                                                                                              | 96-100           | F          | 3.12              | Early-intermediate AMD      |
| 12                                                                                                                                                                                                                                                                                                              | 91-95            | M          | 3.45              | Atrophic AMD                |
| 13                                                                                                                                                                                                                                                                                                              | 91-95            | F          | 3.78              | Atrophic AMD                |
| 14                                                                                                                                                                                                                                                                                                              | 81-85            | F          | 3.50              | Atrophic AMD                |
| 15                                                                                                                                                                                                                                                                                                              | 86-90            | F          | 3.42              | Atrophic AMD                |
| 16                                                                                                                                                                                                                                                                                                              | 86-90            | M          | 4.15              | Atrophic AMD                |
| 17                                                                                                                                                                                                                                                                                                              | 96-100           | F          | 2.33              | Atrophic AMD                |
| 18                                                                                                                                                                                                                                                                                                              | 86-90            | F          | 3.50              | Neovascular AMD             |
| 19                                                                                                                                                                                                                                                                                                              | 91-95            | F          | 4.15              | Neovascular AMD             |
| 20                                                                                                                                                                                                                                                                                                              | 86-90            | F          | 3.80              | Neovascular AMD             |
| Notes:<br>Total 20 eyes of 20 white donors. Age ranges in years: 76-80; 81-85; 86-90; 91-95; 96-100; mean age $89.2 \pm 5.0$ years; 4 males and 16 females. D-P, death to processing time in hours; mean D-P $3.87 \pm 0.72$ hours; 4 unremarkable, 7 early-intermediate AMD, 6 atrophy AMD, 3 neovascular AMD. |                  |            |                   |                             |

203

**Table S6: Antibodies used**

| <b>Antibody Name</b>           | <b>Clone #</b> | <b>Cat#</b> | <b>Lot#</b> | <b>Isotype</b> | <b>Dilution</b> | <b>Vendor Web Link</b>                                                                                                                                                                                                                                  |
|--------------------------------|----------------|-------------|-------------|----------------|-----------------|---------------------------------------------------------------------------------------------------------------------------------------------------------------------------------------------------------------------------------------------------------|
| CD68<br>Monoclonal             | 514H12         | MA1-80133   | C2619       | Mouse IgG 2a   | 1:100           | <a href="https://www.fishersci.com/shop/products/anti-cd68-clone-514h12/ma180133">https://www.fishersci.com/shop/products/anti-cd68-clone-514h12/ma180133</a>                                                                                           |
| CD163<br>Monoclonal            | 10D6           | MA5-11458   | D1118       | Mouse IgG 1    | 1:100           | <a href="https://www.fishersci.com/shop/products/anti-cd163-clone-10d6-thermo-scientific-pierce/pima511458">https://www.fishersci.com/shop/products/anti-cd163-clone-10d6-thermo-scientific-pierce/pima511458</a>                                       |
| RPE65<br>Monoclonal            | 401.8B11.3D9   | MA1-16578   | UE2776581   | Mouse IgG 1k   | 1:150           | <a href="https://www.fishersci.com/shop/products/anti-rpe65-clone-401-8b11-3d9/ampa6578">https://www.fishersci.com/shop/products/anti-rpe65-clone-401-8b11-3d9/ampa6578</a>                                                                             |
| CRALBP<br>Monoclonal           | B2             | MA1-813     | UB272117    | Mouse IgG 1    | 1:500           | <a href="https://www.fishersci.com/shop/products/anti-cralbp-clone-b2/ma1813#">https://www.fishersci.com/shop/products/anti-cralbp-clone-b2/ma1813#</a>                                                                                                 |
| Mouse IgG<br>2a                | PPV-04         | MA1-10418   | UC282768    | Mouse IgG 2a   | 1:1000          | <a href="https://www.fishersci.com/shop/products/mouse-igg2a-clone-ppv-04-isotype-control-thermo-scientific-pierce/pima110418">https://www.fishersci.com/shop/products/mouse-igg2a-clone-ppv-04-isotype-control-thermo-scientific-pierce/pima110418</a> |
| Mouse IgG<br>1Kappa            | P3.6.2.8.1     | 14-4714-82  | 1957953     | Mouse IgG 1k   | RTU             | <a href="https://www.fishersci.com/shop/products/igg1-k-mouse-clone-p3-6-2-8-1-isotype-control-ebioscience-3/501129668">https://www.fishersci.com/shop/products/igg1-k-mouse-clone-p3-6-2-8-1-isotype-control-ebioscience-3/501129668</a>               |
| Horse anti-<br>Mouse<br>Biotin | NA             | PK-7200     | ZE0720      | Horse IgG      | RTU             | <a href="https://vectorlabs.com/catalogsearch/result/?q=pk-7200">https://vectorlabs.com/catalogsearch/result/?q=pk-7200</a>                                                                                                                             |
| RTU, ready to use              |                |             |             |                |                 |                                                                                                                                                                                                                                                         |

**Table S7: Morphologic phenotypes of RPE and its basal lamina in AMD**

| <b>Name</b>                                                                                                                                                                                                                                                             | <b>Attached to basal lamina</b> | <b>Description (in toluidine-blue stained sub-micrometer sections of osmium-tannic-acid paraphenylenediamine post-fixed human eyes)</b>                                            |
|-------------------------------------------------------------------------------------------------------------------------------------------------------------------------------------------------------------------------------------------------------------------------|---------------------------------|------------------------------------------------------------------------------------------------------------------------------------------------------------------------------------|
| Uniform                                                                                                                                                                                                                                                                 | Yes                             | Uniform height and pigmentation; hexagonal                                                                                                                                         |
| Non uniform                                                                                                                                                                                                                                                             | Yes                             | Slightly non-uniform morphology and pigmentation; hexagonal                                                                                                                        |
| Very non uniform                                                                                                                                                                                                                                                        | Yes                             | Very non-uniform morphology and pigmentation                                                                                                                                       |
| Sloughed                                                                                                                                                                                                                                                                | No                              | Continuous epithelium with equally pigmented spherical cells sloughed into sub-retinal space                                                                                       |
| Shedding                                                                                                                                                                                                                                                                | Yes                             | Continuous epithelium with groups of organelles (non-nucleated, non-membrane bound) shed into thick underlying basal laminar deposits; granule aggregates form in the cell bodies. |
| Bilaminar                                                                                                                                                                                                                                                               | Yes                             | Double layers; usually neovascular AMD                                                                                                                                             |
| Vacuolated                                                                                                                                                                                                                                                              | Yes                             | A single large vacuole, sometimes with contents, delimited apically by extremely effaced cytoplasm (rare)                                                                          |
| Intraretinal                                                                                                                                                                                                                                                            | No                              | Anterior migration of nucleated and pigmented cells, singly and in groups, through the external limiting membrane; mostly spherical, some amoeboid                                 |
| Vitelliform                                                                                                                                                                                                                                                             | No                              | Massively liberated RPE organelles in the subretinal space                                                                                                                         |
| Dissociated                                                                                                                                                                                                                                                             | No                              | Spherical cells in scattered in atrophic areas, usually adherent to persistent BLamD.                                                                                              |
| Entombed                                                                                                                                                                                                                                                                | Yes                             | Entombed by fibrovascular scar in neovascular AMD, intermingled with other cells and fluid in the same layer                                                                       |
| Subducted                                                                                                                                                                                                                                                               | No                              | Rounded or flattened, in sub-RPE-basal laminar space, with varying numbers of RPE-characteristic organelles                                                                        |
| Melanotic                                                                                                                                                                                                                                                               | Yes                             | Single or multiple cells in layers with black spherical melanosomes, some large (up to 5 $\mu$ m diameter), in sub-retinal or sub-RPE space; neovascular AMD only                  |
| Entubulated                                                                                                                                                                                                                                                             | No                              | In lumen of outer retinal tubulation (tubes of photoreceptors, mainly cones, scrolled by Müller glia)                                                                              |
| Atrophy with BLamD                                                                                                                                                                                                                                                      | No                              | No RPE, persistent basal laminar deposits                                                                                                                                          |
| Atrophy without BLamD                                                                                                                                                                                                                                                   | No                              | No RPE, no basal laminar deposit (retina consists of gliotic Müller cells in contact with inner collagenous layer of Bruch's membrane)                                             |
| Phenotypes defined using 1- $\mu$ m-thick epoxy resin sections of osmium-tannic-acid paraphenylenediamine post-fixed human eyes with AMD, stained with toluidine blue, referenced to previously published AMD morphology (18, 19, 25). All cells except where noted are |                                 |                                                                                                                                                                                    |



nucleated and have abundant lipofuscin, melanolipofuscin, and characteristic spindle-shaped melanosomes in the cell bodies. Melanosomes are abundant in apical processes (9), which may be lost due to disease or to artifactual detachment of photoreceptors from RPE or both. Lipofuscin and melanolipofuscin are ovoid (~1  $\mu\text{m}$  in diameter), densely packed, and green-bronze-olive color in toluidine blue stain, depending on the specimen. Cell morphologies recognized in this preparation are readily identified in the cryosections used in this study. Granule aggregates (Shedding phenotype) are also visible in RPE cell bodies by fluorescence microscopy (36). Vitelliform (90) is under active investigation (45) and was not identified in the current series but is included for completeness.
